# Supplementary material for: Preparation of platinum nanoparticles using iron(ii) as reductant and photosensitized H2 generation on an iron storage protein scaffold
Source: Royal Society of Chemistry journal article supplement (doi:10.1039/d0ra00341g), 2020-01-01
Supplement: d0ra00341g1.pdf [file d0ra00341g1.pdf]

## Supplementary Information

### **Preparation of Platinum Nanoparticles using Iron(II) as Reductant and Photosensitized H<sub>2</sub> Generation on an Iron Storage Protein Scaffold**

Brenda S. Benavides and Donald M. Kurtz, Jr.\*

Department of Chemistry, University of Texas at San Antonio, San Antonio, Texas, USA

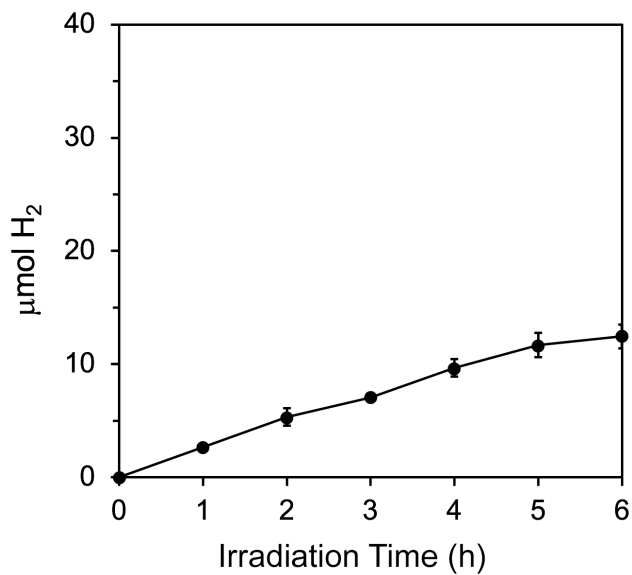

**Fig. S1.** Photosensitized H<sub>2</sub> production upon white light irradiation of an aqueous solution containing Pt/Fe-Hfn at 60 μM Pt, 72 μM fluorescein and 0.3 M TEOA pH 9. The plot is on the same μmol H<sub>2</sub> scale (0 – 40) as that in Fig. 6 for easier visual comparison. Error bars represent standard deviations from the average for three simultaneously irradiated reaction vials.

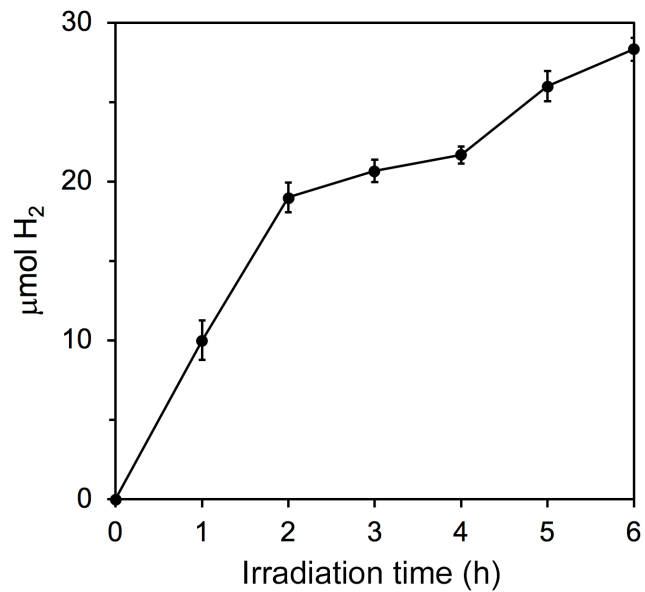

**Fig. S2.** Photosensitized H<sub>2</sub> production upon irradiation using a  $550 \pm 20$  nm filter of an aqueous solution containing Pt/Fe-Hfn at 60 μM Pt, 72 μM EY and 0.3 M TEOA pH 9. Error bars represent standard deviations from the average for three simultaneously irradiated reaction vials.

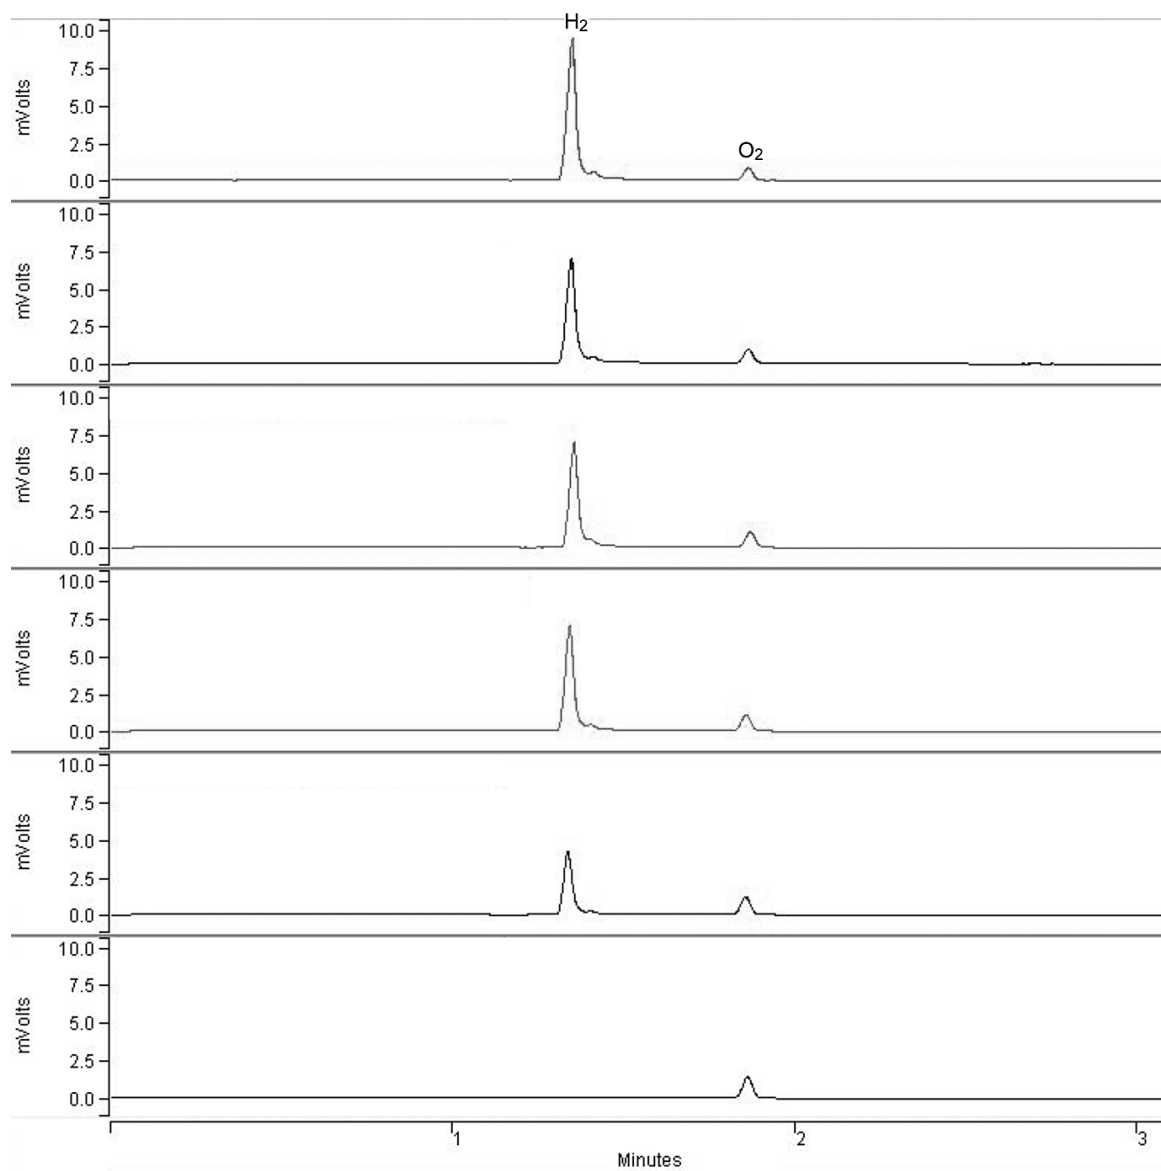

**Fig. S3.** Time-dependent GC traces for headspace sampling of a white light-irradiated aerobic aqueous solution containing Pt/Fe-Hfn (60  $\mu$ M Pt), 72  $\mu$ M EY and 0.3 M TEOA pH 9. Headspace sampling times are, bottom to top: prior to irradiation, and 1 h, 2 h, 3 h, 4 h, or 5 h irradiation.

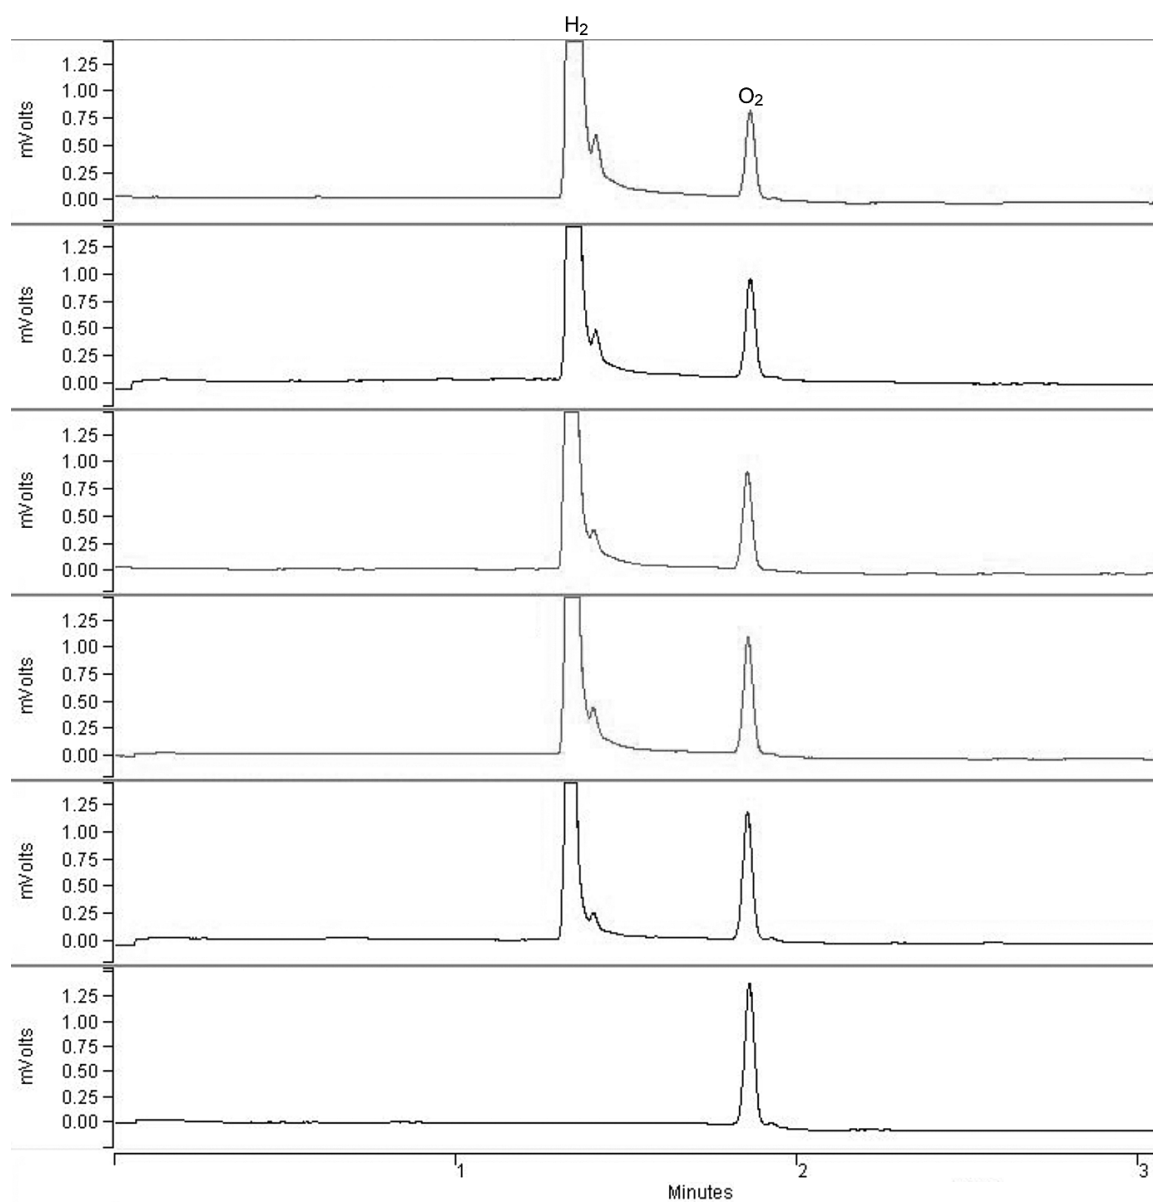

**Fig. S4.** Same time-dependent GC traces as shown in Fig. S3 but with scale expanded to better illustrate O<sub>2</sub> peak intensities.
